# Supplementary material
Source: ML conference proceedings conference paper supplement (https://openreview.net/forum?id=t86MwoUCCNe)

Real dataset Regression:  $S = 8192$ ,  $n = 8$ ,  $d = 12$   
 $lr = 0.1$ , batch = 1024, qlevel = 16

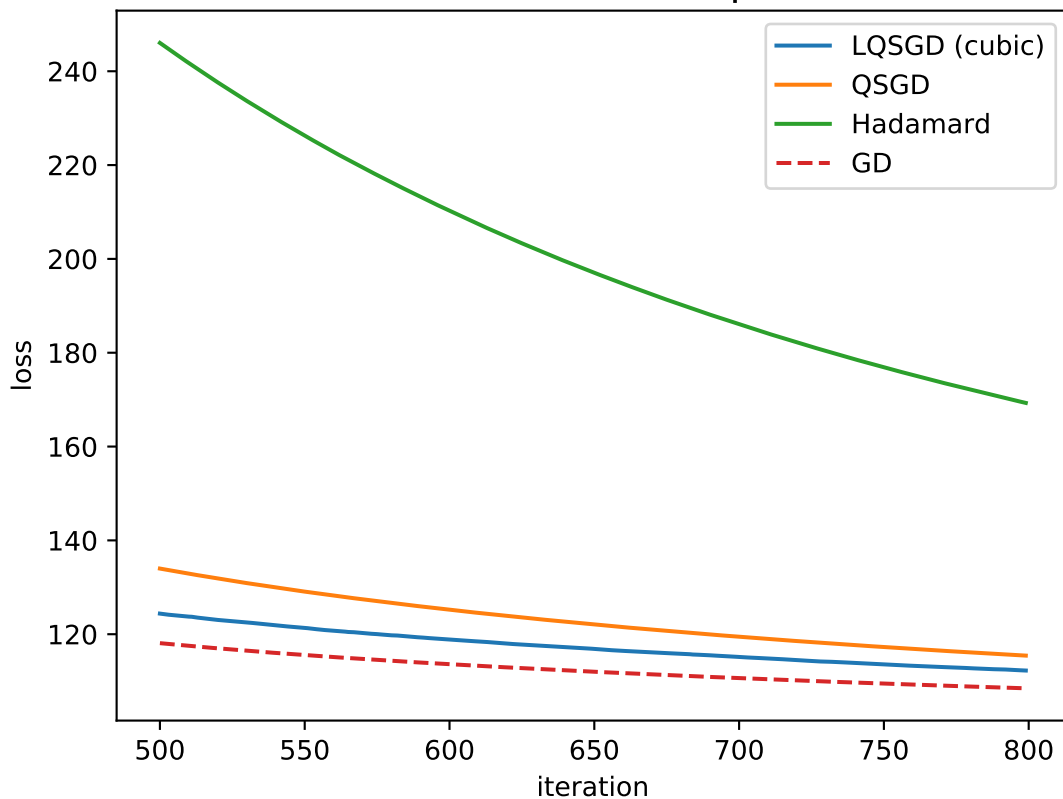

Supplement: supplementary_material [file attachment]

Regression convergence:  $S = 32768$ ,  $n = 2$   
 $d = 100$ ,  $lr = 0.8$ ,  $batch = 16384$ ,  $qlevel = 8$

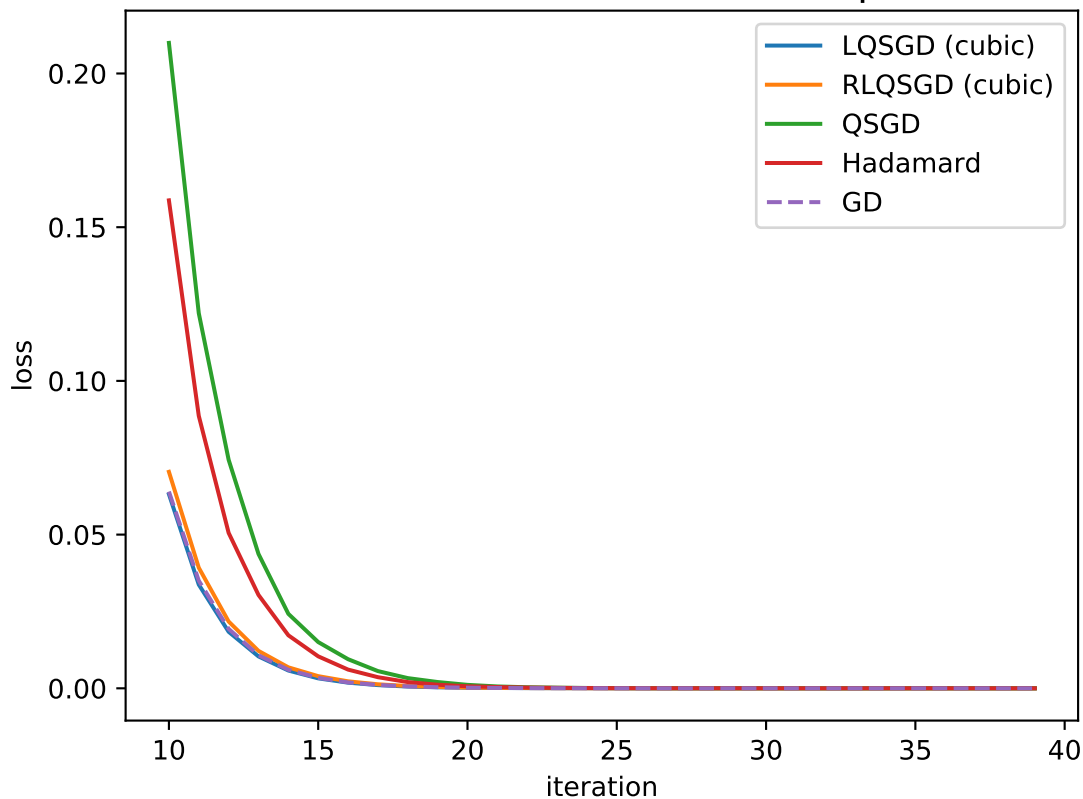

Supplement: supplementary_material [file attachment]

Local SGD quantization error:  $S = 8192$ ,  $n = 2$   
 $d = 100$ ,  $\text{lr} = 0.1$ ,  $\text{batch} = 4096$ ,  $q = 8$ ,  $\text{rep} = 10$

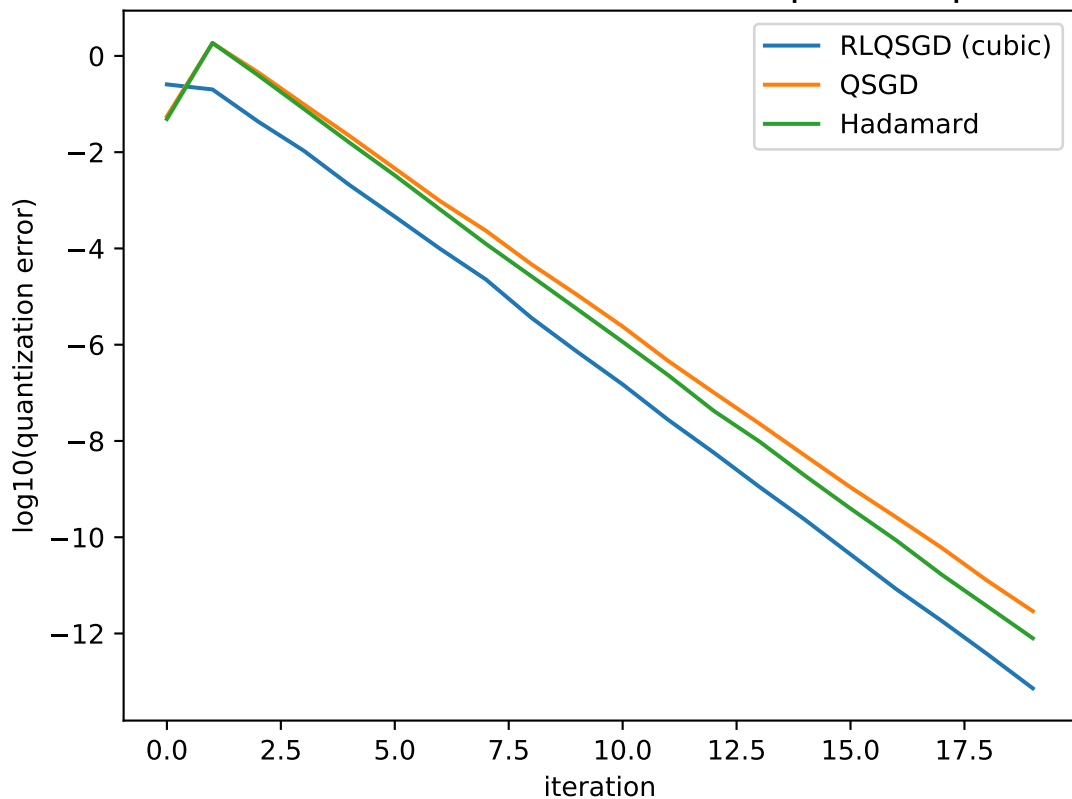

Supplement: supplementary_material [file attachment]

# Power Iteration Norms

$S = 8192, d = 128, \text{qlevel} = 64$

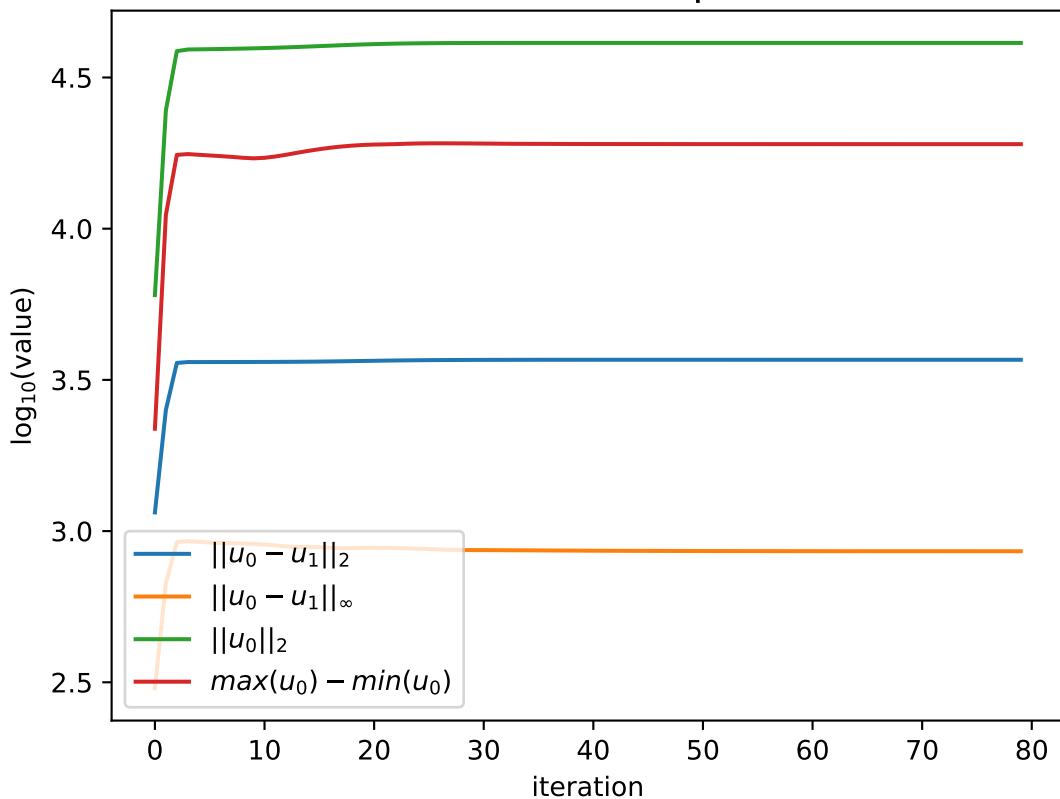

Supplement: supplementary_material [file attachment]

# Power Iteration Convergence

$S = 8192, d = 128, qlevel = 64$

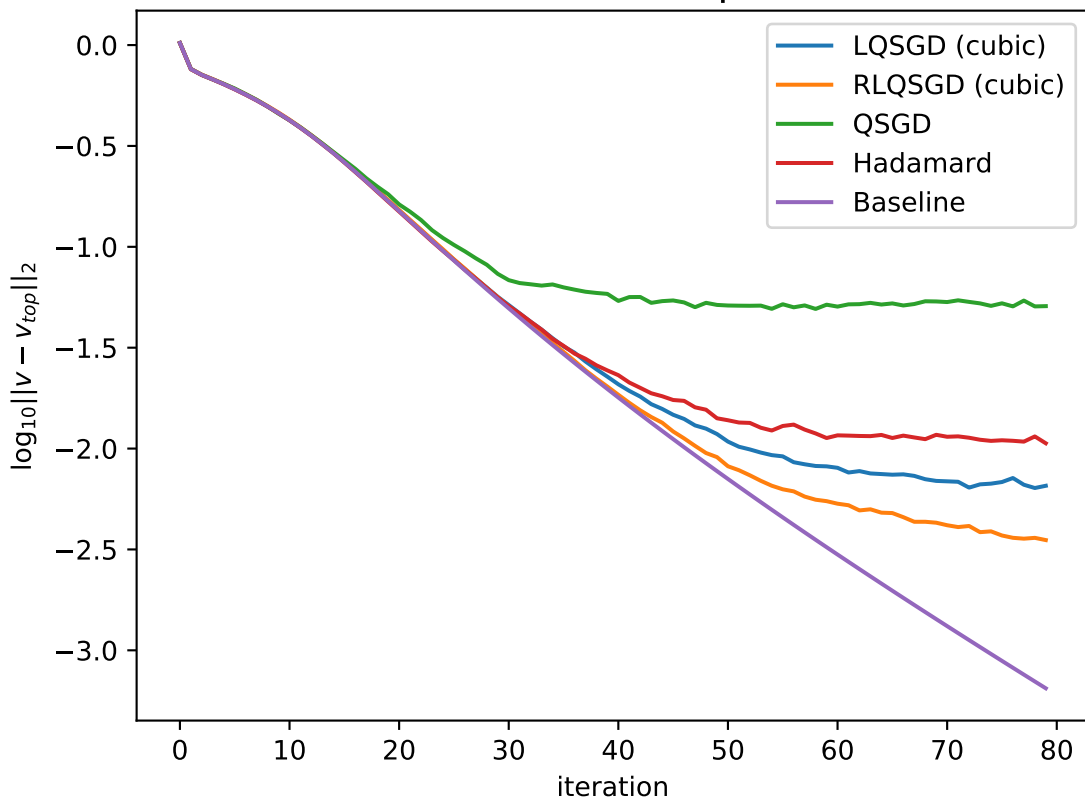

Supplement: supplementary_material [file attachment]

# Power Iteration Quantization Error

$S = 8192$ ,  $d = 128$ ,  $qlevel = 64$

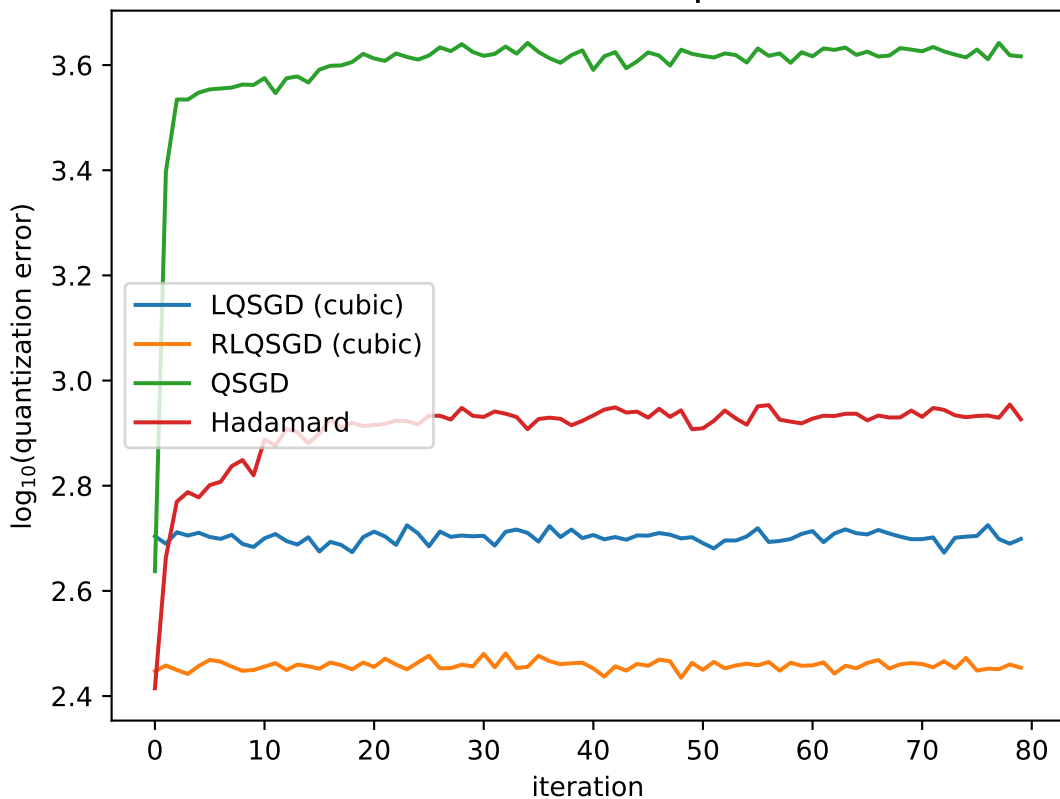

Supplement: supplementary_material [file attachment]

# Power Iteration Norms

$S = 8192, d = 128, \text{qlevel} = 64$

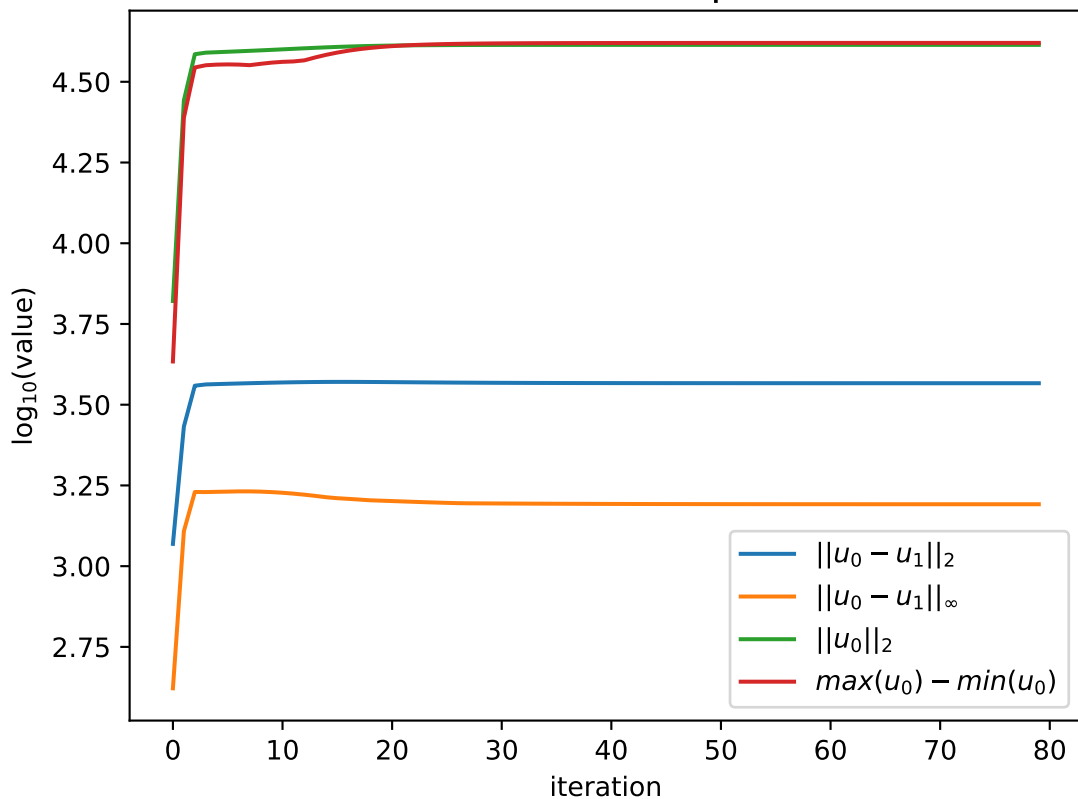

Supplement: supplementary_material [file attachment]

Variance of vqsgd vs lqsgd at bits  $\leq 126$ ,  $S = 32768$   
 $n = 2$ ,  $d = 256$ ,  $\text{batch\_size} = 16384$

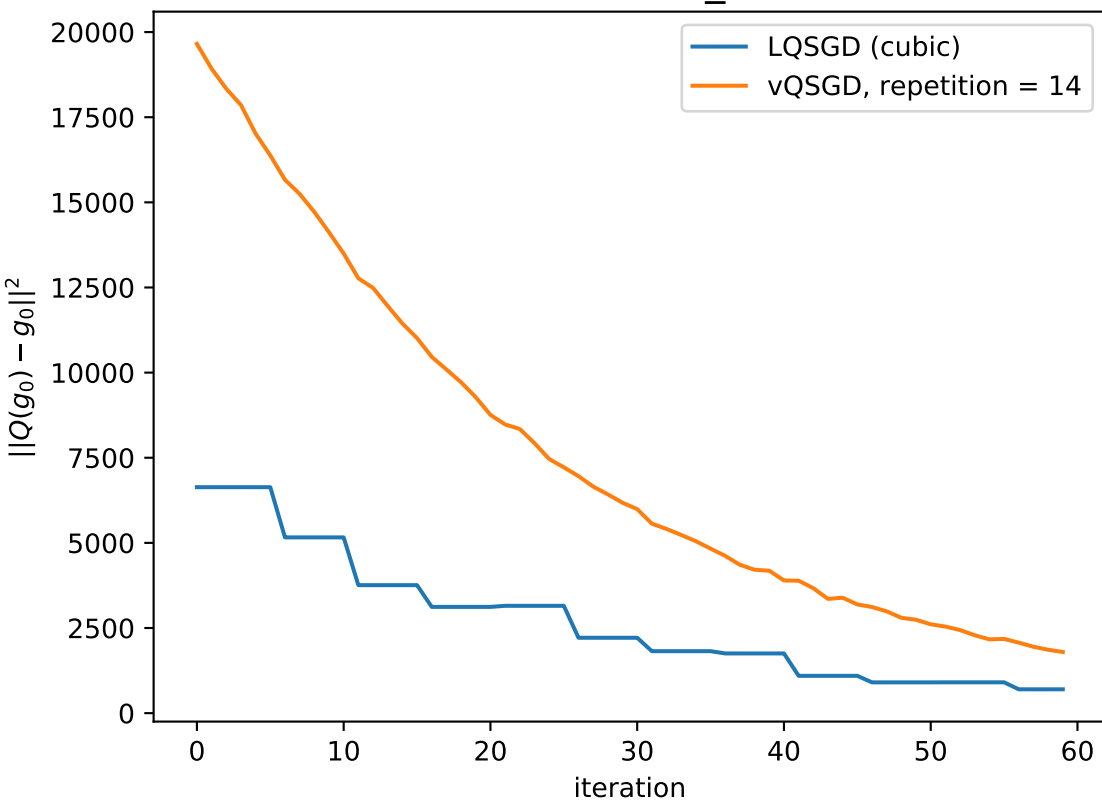

Supplement: supplementary_material [file attachment]

Regression norms:  $S = 8192$ ,  $n = 2$   
 $d = 100$ ,  $\text{batch\_size} = 4096$

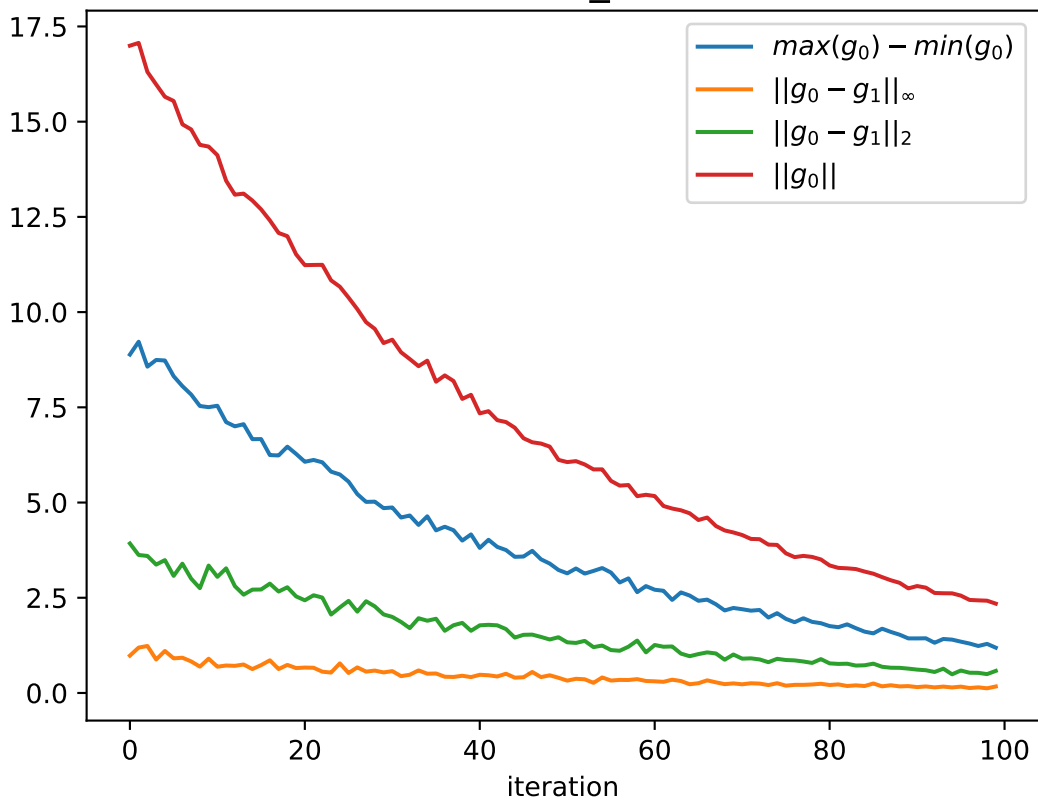

Supplement: supplementary_material [file attachment]

Variance of vqsgd vs lqsgd at bits  $\leq 126$ ,  $S = 8192$   
 $n = 2$ ,  $d = 256$ ,  $\text{batch\_size} = 4096$

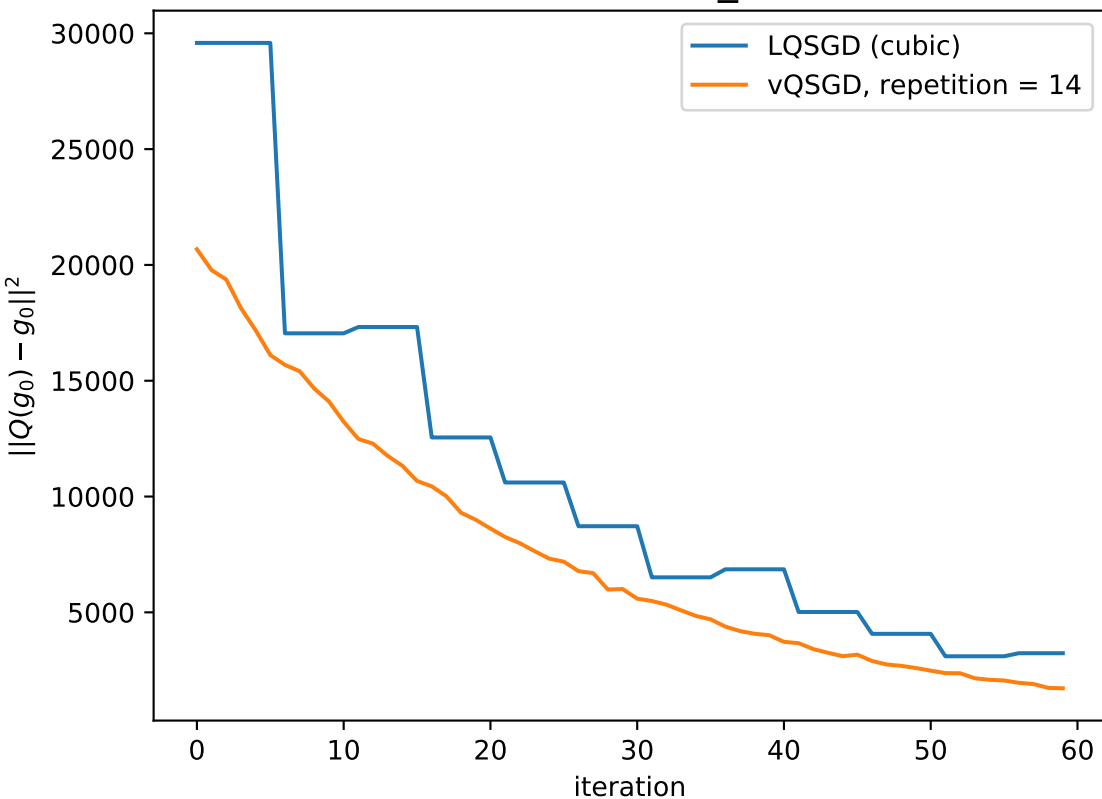

Supplement: supplementary_material [file attachment]

# Regression Variance

$S = 8192, n = 2, d = 100, \text{batch\_size} = 4096$

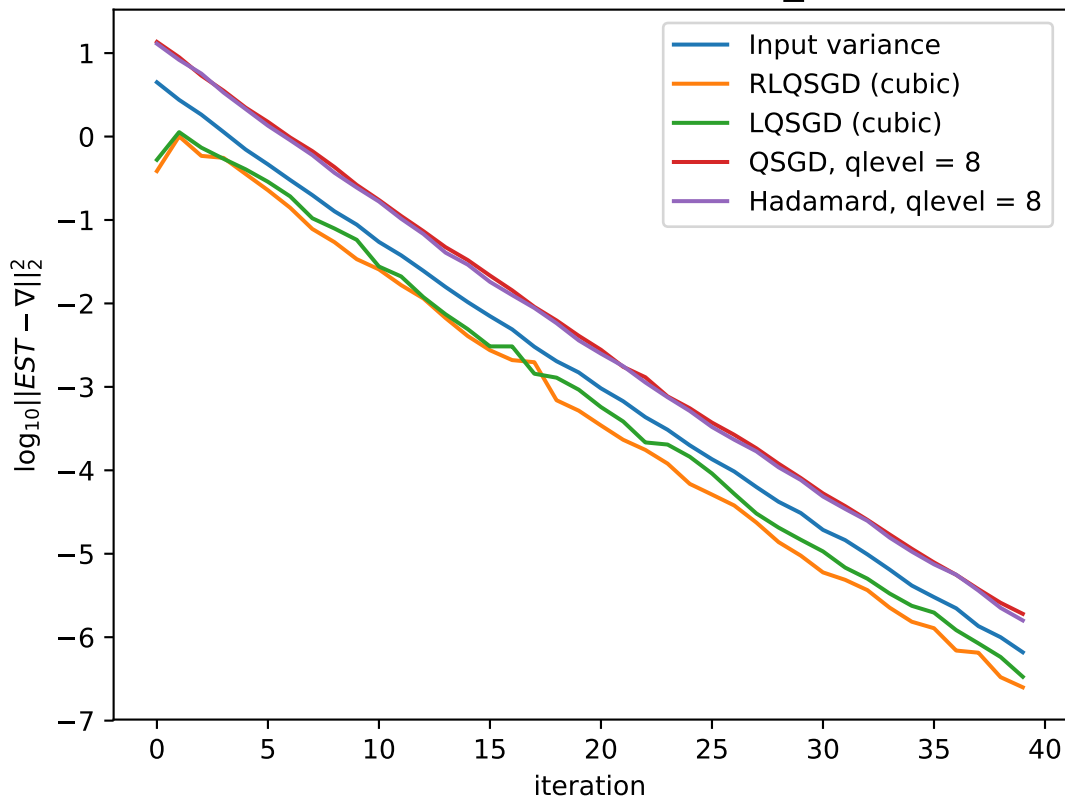

Supplement: supplementary_material [file attachment]

Regression convergence:  $S = 8192$ ,  $n = 2$   
 $d = 100$ ,  $lr = 0.8$ ,  $batch = 4096$ ,  $qlevel = 8$

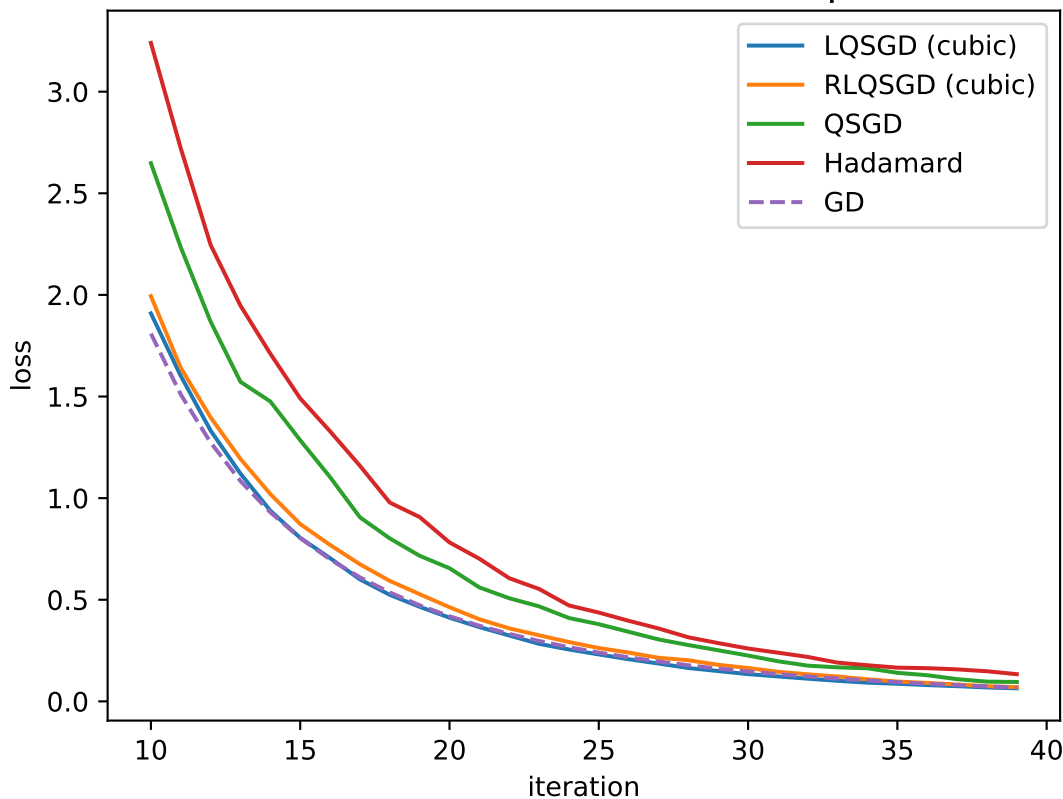

Supplement: supplementary_material [file attachment]

Local SGD Convergence:  $S = 8192$ ,  $n = 2$   
 $d = 100$ ,  $\text{lr} = 0.1$ ,  $\text{batch} = 4096$ ,  $q = 8$ ,  $\text{rep} = 10$

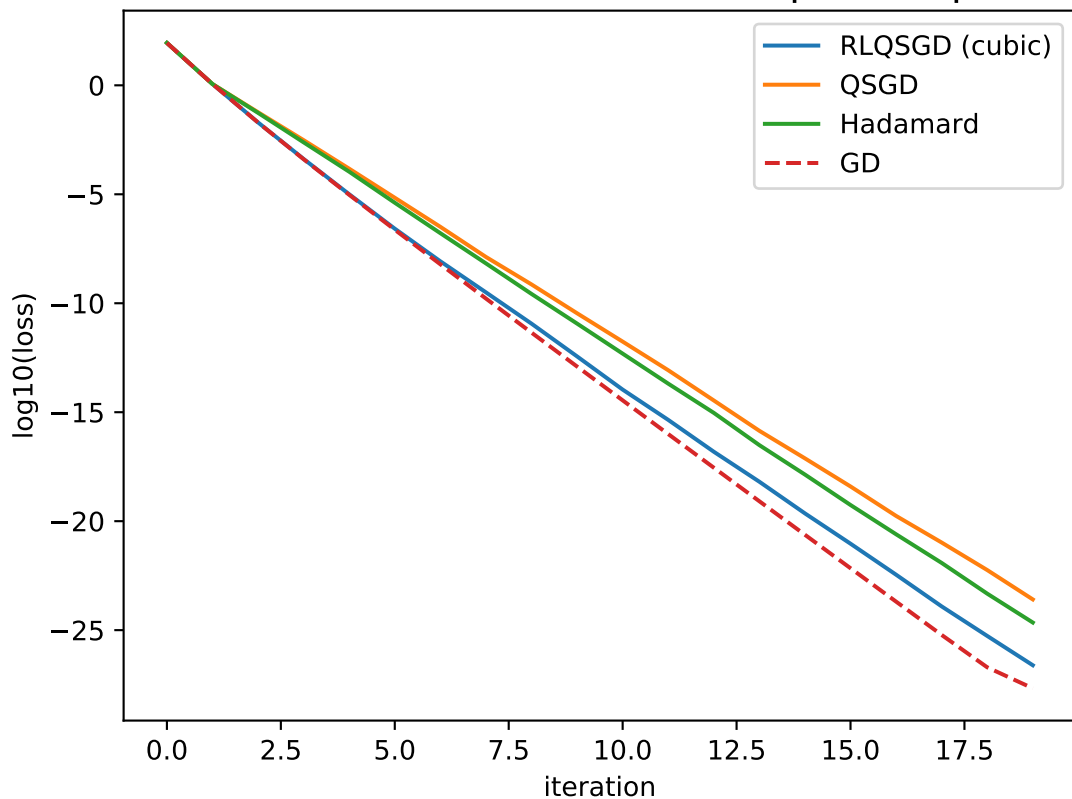

Supplement: supplementary_material [file attachment]

$S = 8192, n = 8, d = 12$   
 $lr = 0.1, \text{batch} = 1024, \text{qlevel} = 16$

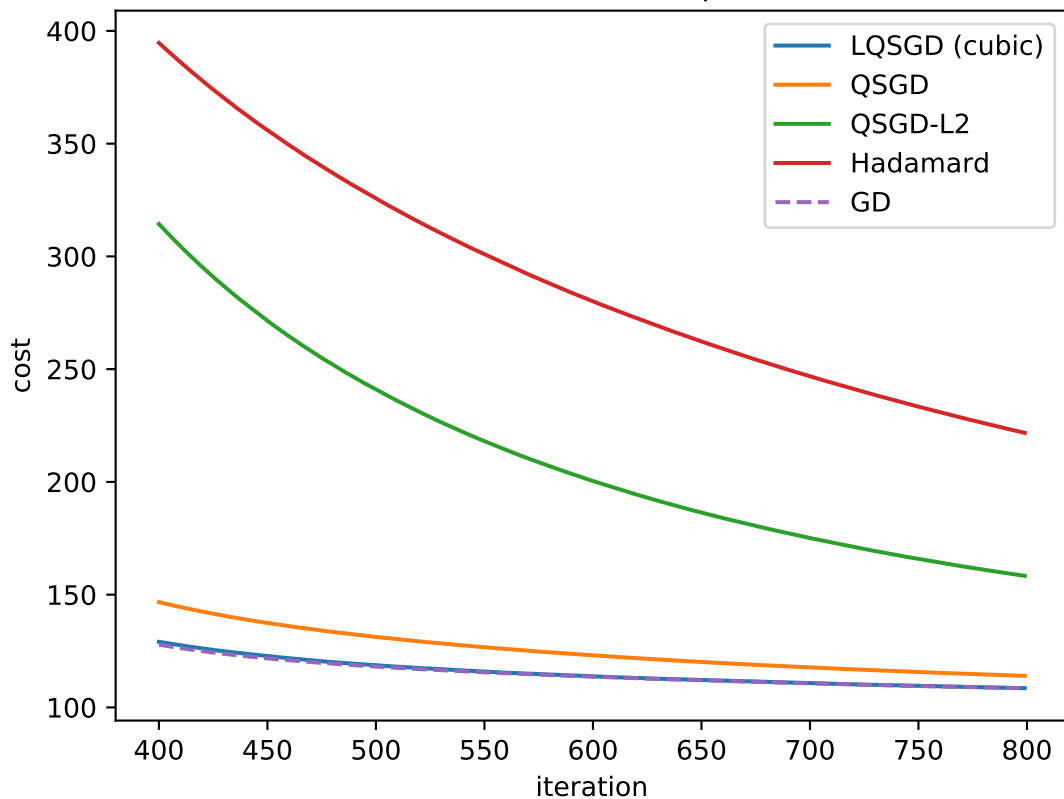

Supplement: supplementary_material [file attachment]

# Power Iteration Convergence

$S = 8192$ ,  $d = 128$ ,  $qlevel = 64$

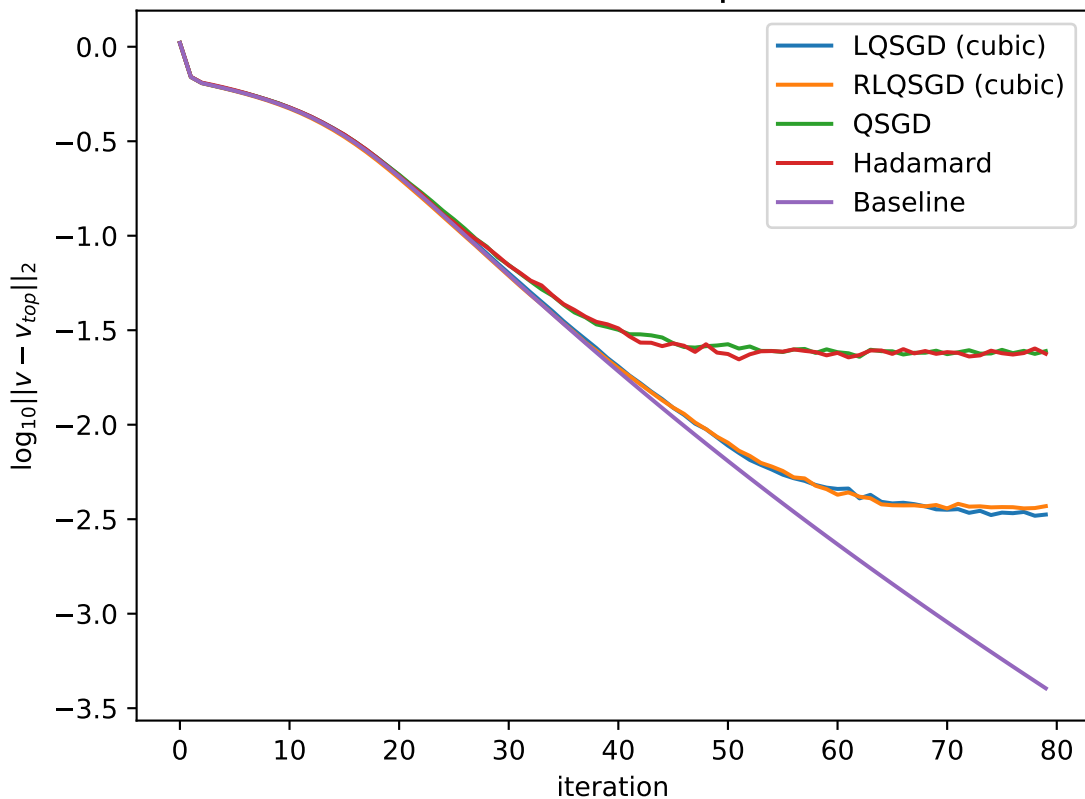

Supplement: supplementary_material [file attachment]

# Power Iteration Quantization Error

$S = 8192, d = 128, qlevel = 64$

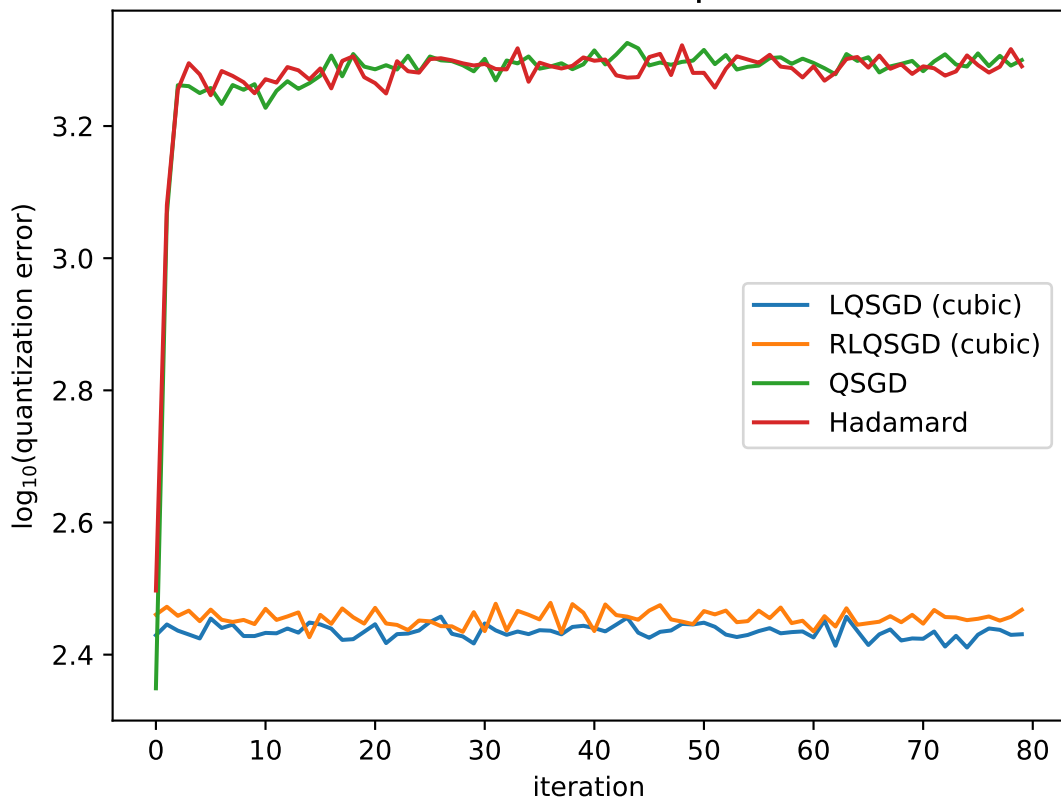

Supplement: supplementary_material [file attachment]

$S = 8192$ ,  $n = 16$ ,  $d = 12$   
 $lr = 0.1$ ,  $batch = 512$ ,  $qlevel = 16$

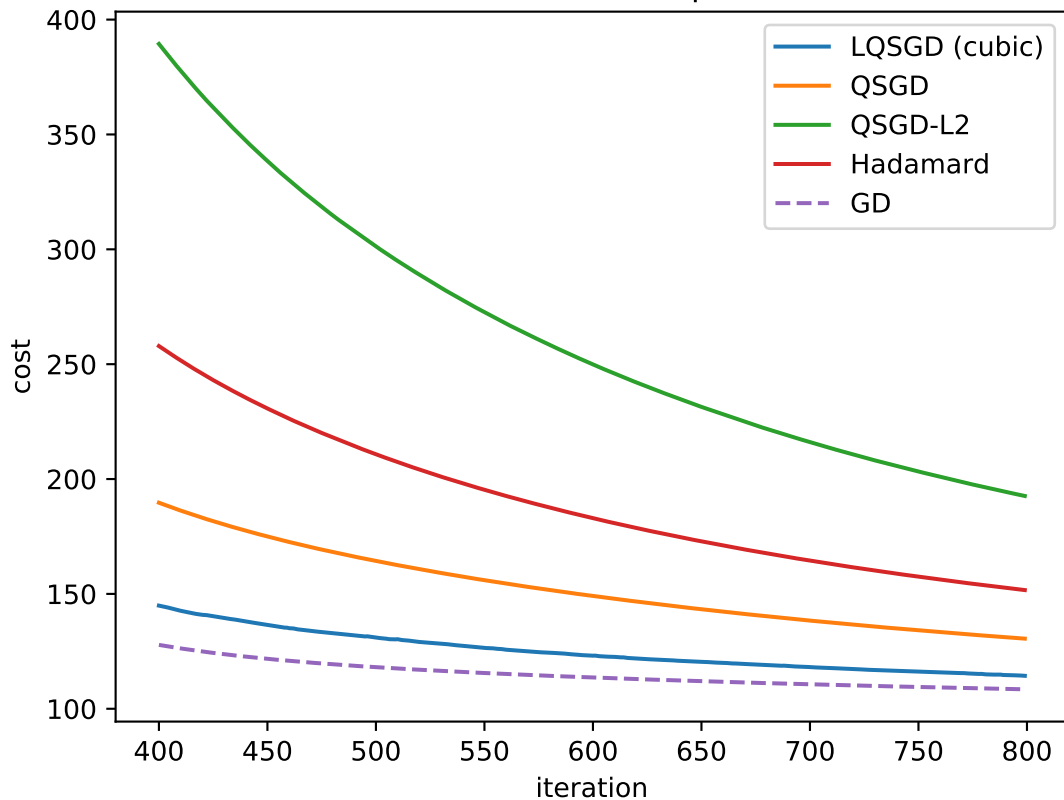

Supplement: supplementary_material [file attachment]

# Regression Variance

$S = 32768$ ,  $n = 2$ ,  $d = 100$ ,  $\text{batch\_size} = 16384$

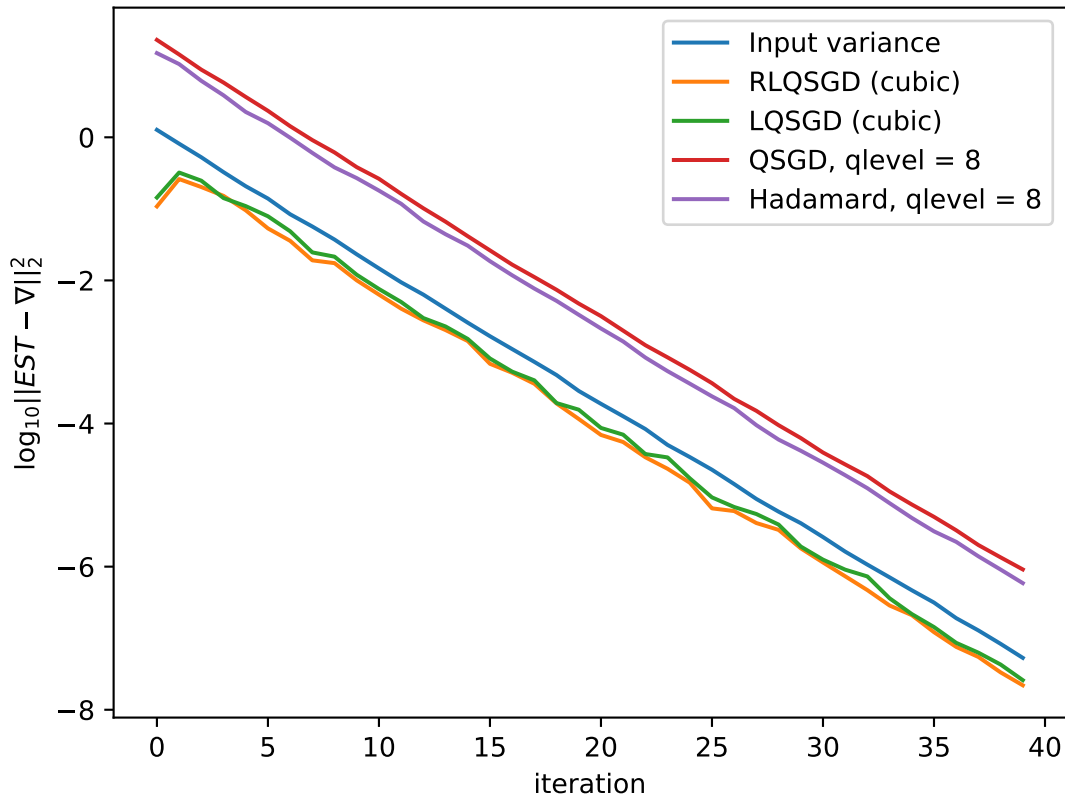

Supplement: supplementary_material [file attachment]

Regression norms:  $S = 32768$ ,  $n = 2$   
 $d = 100$ ,  $\text{batch\_size} = 16384$

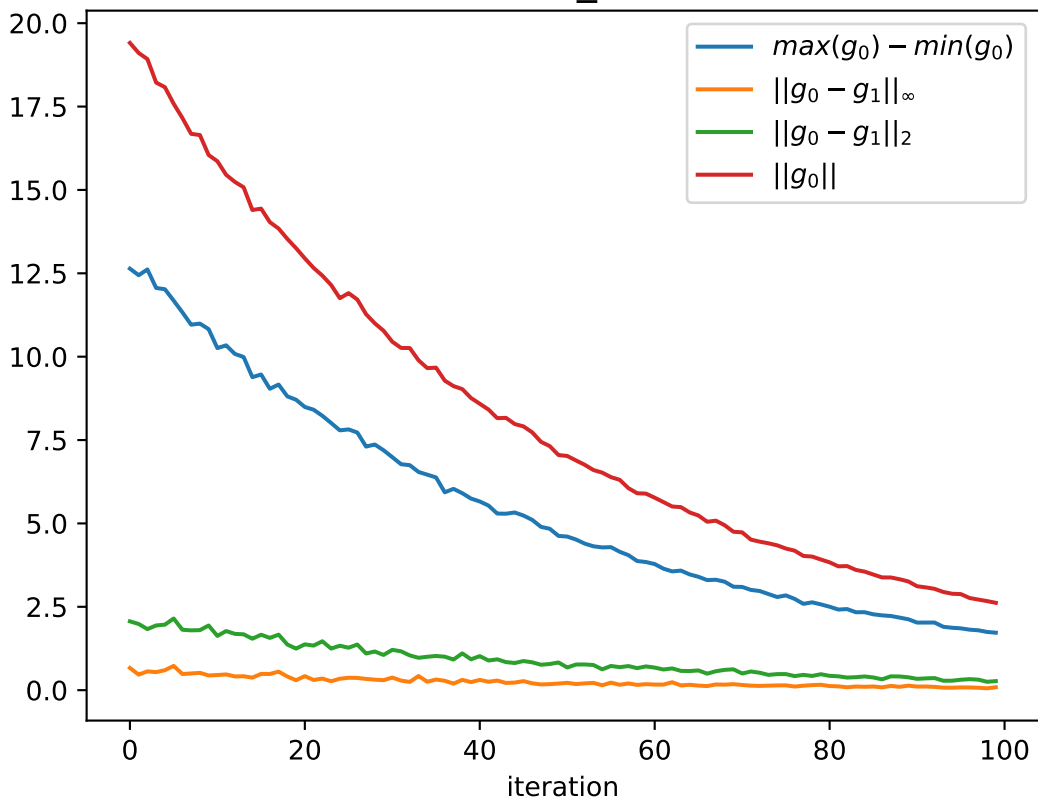

Supplement: supplementary_material [file attachment]

Real dataset Regression:  $S = 8192$ ,  $n = 16$ ,  $d = 12$   
 $lr = 0.1$ , batch = 512, qlevel = 16

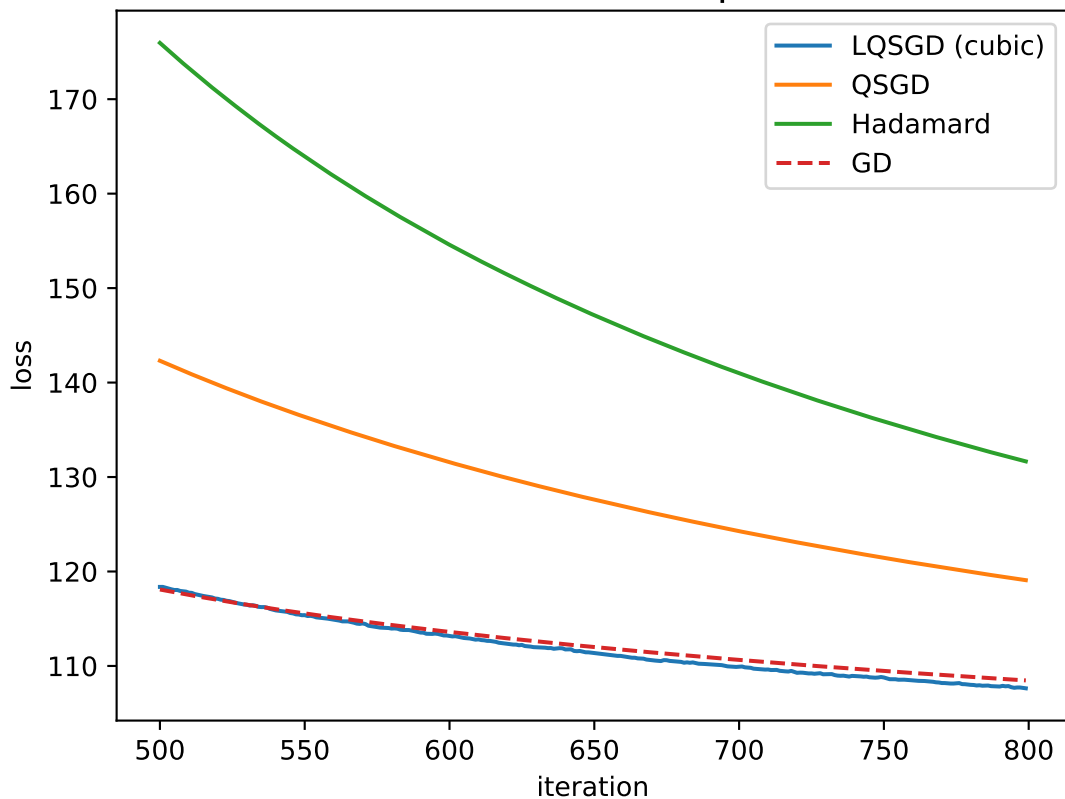

Supplement: supplementary_material [file attachment]
